# Supplementary material for: A Non-Rogue Mutant Line Induced by ENU Mutagenesis in Paramutated Rogue Peas (Pisum sativum L.) Is Still Sensitive to the Rogue Paramutation
Source: MDPI journal article supplement (doi:10.3390/genes12111680), 2021-10-23
Supplement: s1 [file s1]

**SUPPLEMENTARY INFORMATION:**

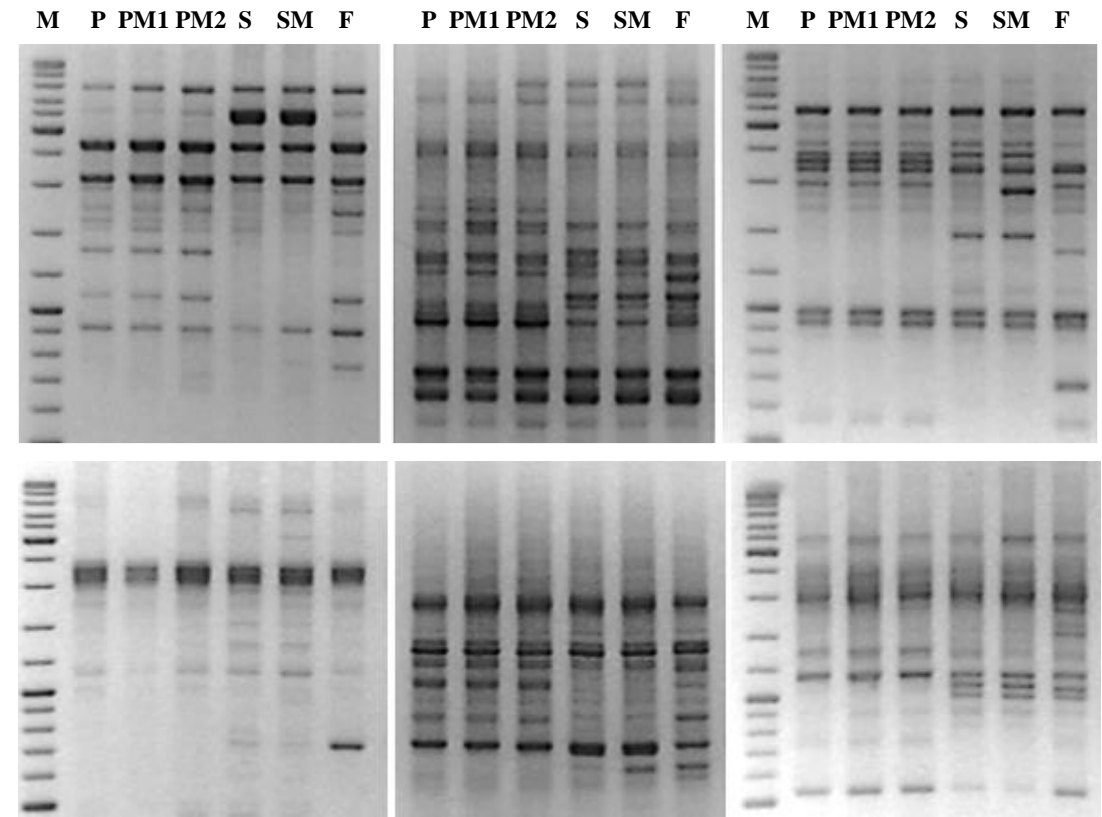

**Figure S1.** RAPD patterns of: **P** - cv. Progreta; **PM1** - Progreta mutant1; **PM2** - Progreta mutant2; **S** - cv. Solara; **SM** - Solara mutante; **F** - cv. Frilene. **M** – DNA ladder

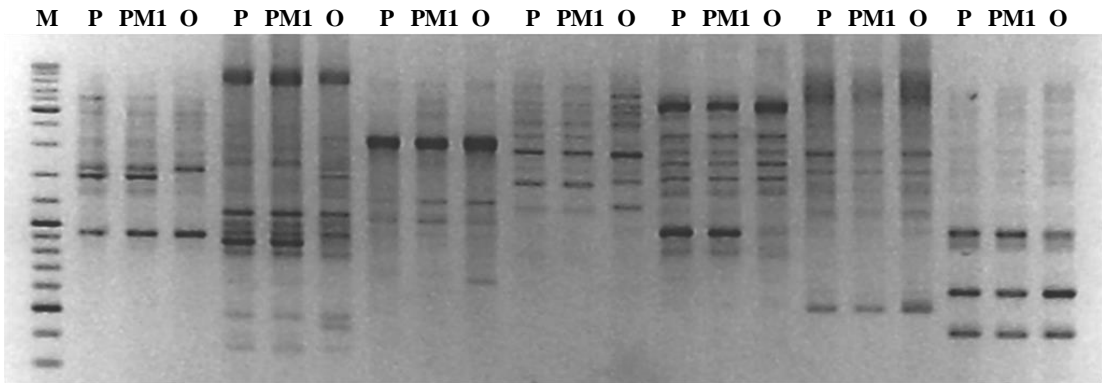

**Figure S2.** RAPD patterns of **P**- cv. Progreta, **PM1** \_Progreta mutante 1 (SRP1), **O** – cv. Onward. **M** – DNA ladder

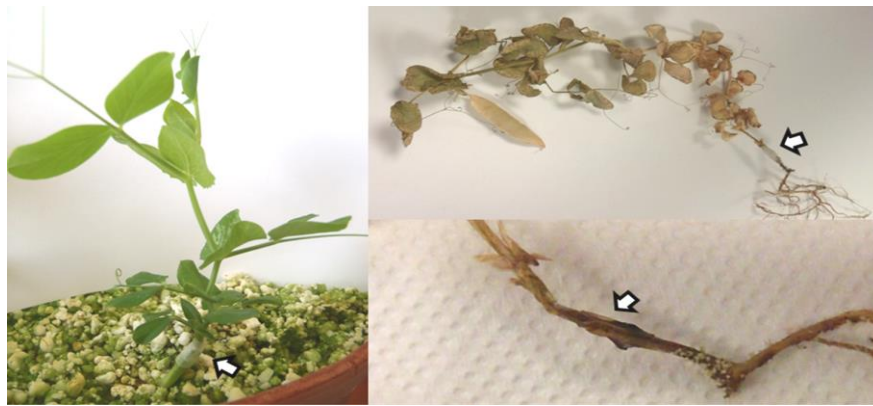

**Figure S3.** Plants of *cv. Douce de Provence* grafted on rogue *cv. Progreta* plants. **(Left)** Leaflets and stipula of the mature grafted plant exhibit the common non-rogue phenotype of *cv. Douce de Provence*. **(Right)** Senescent plant of *cv. Douce de Provence* grafted on rogue plant of *cv. Progreta*. Notice the regeneration of the plant tissue in the grafting region (white arrows).
